# Supplementary material for: A novel co-precipitation method for one-pot fabrication of a Co–Ni multiphase composite electrode and its application in high energy-density pseudocapacitors
Source: Royal Society of Chemistry journal article supplement (doi:10.1039/c3cc43350a), 2013-01-01
Supplement: c3cc43350a.pdf [file c3cc43350a.pdf]

Electronic Supplementary Material (ESI) for Chemical Communications  
This journal is © The Royal Society of Chemistry 2013

# Novel co-precipitation method for one-pot fabrication of Co-Ni multiphase composite electrode and its application to high energy-density pseudocapacitor

Joah Han<sup>a,b</sup>, Kwang Chul Roh\*<sup>a</sup>, Mi Ru Jo<sup>c</sup>, Yong-Mook Kang\*<sup>c</sup>

<sup>a</sup>Energy Materials Center, Green Ceramics Division, Korea Institute of Ceramic Engineering & Technology, 233-5 Gasan-dong, Guemcheon-gu, Seoul 153-801, Republic of Korea

<sup>b</sup> Department of Materials Science & Engineering, Korea University, Anam-dong, Seongbuk-Gu, Seoul 136-701, Republic of Korea

<sup>c</sup> Department of Energy & Materials Engineering, Dongguk University-Seoul, Pil-dong 3-ga, jung gu, Seoul 100-715, Republic of Korea

E-mail: [rkc@kicet.re.kr](mailto:rkc@kicet.re.kr) (Kwang Chul Roh)

E-mail: [dake1234@dongguk.edu](mailto:dake1234@dongguk.edu) (Yong-Mook Kang)

## Electronic Supplementary Information (ESI†)

### CONTENTS

|                                                     | Page |
|-----------------------------------------------------|------|
| Methods.....                                        | 2    |
| FTIR studies.....                                   | 2    |
| Cyclic voltammetry analysis.....                    | 2    |
| Galvanostatic charge-discharge analysis .....       | 2    |
| Energy density and power density analysis.....      | 3    |
| References .....                                    | 3    |
| Table S1 pH analysis .....                          | 4    |
| Table S2 EDX analysis .....                         | 4    |
| Fig. S1 A schematic of the composite film.....      | 5    |
| Fig. S2 SEM image.....                              | 6    |
| Fig. S3 FTIR spectra.....                           | 7    |
| Fig. S4 Galvanostatic charge-discharge curves ..... | 8    |
| Fig. S5 Ragone plot.....                            | 9    |

Electronic Supplementary Material (ESI) for Chemical Communications  
This journal is © The Royal Society of Chemistry 2013

## Methods

**Electrode fabrication with active material.** A Co-Ni multiphase composite thin film was prepared by a new process (Fig S1). The cobalt precursor, cobalt nitrate hydrate ( $\text{Co}(\text{NO}_3)_2 \cdot 6\text{H}_2\text{O}$ ) and the nickel precursor ( $\text{Ni}(\text{NO}_3)_2 \cdot 6\text{H}_2\text{O}$ ) were added. The molar ratios of the  $\text{Co}(\text{NO}_3)_2 \cdot 6\text{H}_2\text{O}$  :  $\text{Ni}(\text{NO}_3)_2 \cdot 6\text{H}_2\text{O}$  was 4 : 6. The composite preparation process was started after the addition of 100ml of 1M LiOH solution as the precipitant and 10ml of 2 M hydroxylamine  $\text{NH}_2\text{OH}$  solution as the chelating agent by applying 0.9 V between the electrodes overnight at room temperature (25°C). The titanium (Ti) substrate used was pre-coated with a commercial activated carbon to form the anode and pre-coated with acetylene black to form the cathode, respectively. The obtained electrode surfaces were rinsed with deionized water and finally dried overnight at 60°C in air. The final loading amount was 15mg.

**FTIR studies.** Fig S2 shows the FTIR spectrum of the Co-Ni multiphase composite thin films. From the spectrum, it can be seen that the broad band centred around  $3400\text{ cm}^{-1}$  and  $1500\text{ cm}^{-1}$  is assigned to the stretching vibration mode of -OH group and the strong band around  $520\text{ cm}^{-1}$  is associated with the Co-O vibrations. The strong band observed around at  $660\text{ cm}^{-1}$  corresponds to the Ni-O-H vibrations and the one around at  $1380\text{ cm}^{-1}$  corresponds to the  $\text{NiO}_3^-$  vibrations.<sup>1</sup> In summary, the spectrum indicates the presence of Co-O, Ni-O-H and -OH groups. It also confirms that the composite material is in the  $\alpha$ - phase. Thus the formation of the  $\alpha$ - phase Co-Ni multiphase composite thin films is supported by the FTIR studies.<sup>2,3</sup> The results also support the presence of  $\text{Co}(\text{OH})_2$ ,  $\text{CoOOH}$ , and  $\text{Ni}(\text{OH})_2$  found by the XPS analysis as discussed in our manuscript.

**Cyclic voltammetry study.** The capacitance performance was primarily determined due to these Faradic reactions.<sup>4,5</sup>

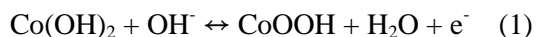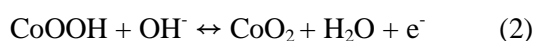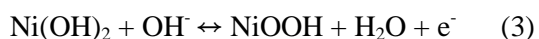

The specific capacitance  $C_{sp}$ , of the electrode can be calculated according to the following relation:

$$C = \frac{I \cdot t}{\Delta V} \quad (4)$$

where  $I$  is the discharge current [A],  $\Delta t$  is the discharge time [s] and  $\Delta V$  is the potential window [V] of the discharge process, and  $m$  is the mass of the active materials [g].<sup>6,7</sup>

**Galvanostatic charge-discharge analysis.** Fig S3 shows the galvanostatic charge-discharge curves at various current densities. The shape of the discharge curves shows pseudocapacitance similar to the result of the CV curves. The specific capacitances of the sample at the current density of  $5\text{ mA cm}^{-2}$  was  $840\text{ F g}^{-1}$ .

Electronic Supplementary Material (ESI) for Chemical Communications  
**This journal is © The Royal Society of Chemistry 2013**

**Energy density and power density analysis.** Energy density of the electrode can be derived from the CV curves using the following equation :

$$ED = \frac{1}{2} \cdot C_{sp} \cdot \Delta V^2 \quad (5)$$

where  $C_{sp}$  is specific capacitance (F) and  $\Delta V$  is the potential window (V).<sup>8,9</sup> The power density of the electrode can be calculated from the following equation:

$$PD = \frac{ED}{\Delta t} \quad (6)$$

where ED is the energy density, and  $\Delta t$  is the discharge time (s).<sup>9</sup> The energy density of the composite film was about 38.9 Wh kg<sup>-1</sup> at the scan rate of 1 mV s<sup>-1</sup>, whereas its power density was approximately 21 kW kg<sup>-1</sup> at 1000 mV s<sup>-1</sup>. We also calculated the energy and power densities of other materials to compare with those of our material.<sup>5, 10, 11, 12</sup> The result is shown in Fig. S5. In fact, in previous studies, the electrochemical properties were already saturated. However, in our study on composite material electrodes made by the co-precipitation method, the electrochemical properties were similar or better.

## References

- 1 D-J. Goebbort, E. Garand, *J. Phys. Chem. A.*, 2009, **113**, 7584-7592
- 2 Z.A. Hu, Y.L. Xie, Y.X. Wang, H.Y. Wu, Y.Y. Yang, Z.Y. Zhang, *Electrochim. Acta.*, 2009, **54**, 2737-2741.
- 3 D.P. Dubal, A.D. Jagadale, S.V. Patil, C.D. Lokhande, *Mater. Res. Bull.*, 2012, **47**, 1239-1245.
- 4 V. Gupta, S. Gupta, N. Miura, *J. Power Sources*, 2008, **175**, 680-685.
- 5 Rahul R. R. Salunkhe, K. Jang, S. W. Lee and H. Ahn, *RSC Adv.*, 2012, **2**, 3190.
- 6 J. Li, M. Yang, J. Wei and Z. Zhou, *Nanoscale*, 2012, **4**, 4498.
- 7 G. W. Yang, C. L. Xu and H. L. Li, *Chem. Commun.*, 2008, 6537.
- 8 R. R. Salunkhe, K. Jang, S. W. Lee and H. Ahn, *RSC Adv.*, 2012, **2**, 3190.
- 9 X. H. Xia, J. P. Tu, Y. Q. Zhang, Y. J. Mai, X. L. Wang, C. D. Gu and X. B. Zhao, *J. Phys. Chem. C.*, 2011, **115**, 22662.
- 10 H. Jung, N. Venugopal, B. Scrosati, Y. Sun, *Journal of Power Sources*, 2013, **221**, 266-271.
- 11 Y. Wang, L. Cheng, Y. Xia, *Journal of Power Sources*, 2006, **153**, 191-196.
- 12 J. Li, X. Wang, Q. Huang, S. Gamboa, P.J. Sebastian, *Journal of Power Sources*, 2006, **160**, 1501-1505.

Electronic Supplementary Material (ESI) for Chemical Communications  
**This journal is © The Royal Society of Chemistry 2013**

**Table S1** The variation of pH with the amount of 1 M LiOH used as the precipitant in the Co-Ni solution. The fabrication method of the Co-Ni multiphase composite thin films mostly depends on pH control. The Co-Ni solution remains neutral after the reaction.

| Molar ratio (Co:Ni) | 1M LiOH Solution (ml) |     |     |     |     |           |
|---------------------|-----------------------|-----|-----|-----|-----|-----------|
|                     | 0                     | 30  | 60  | 90  | 100 | 100 (12h) |
| 4:6                 | 3.3                   | 6.4 | 6.6 | 6.8 | 6.9 | 6.8       |

**Table S2** EDX analysis of Co and Ni in the thin films fabricated with a given molar ratio of cobalt nitrate and nickel nitrate.

| Molar ratio (Co:Ni) | Co(atomic %) | Ni(atomic %) | O(atomic %) |
|---------------------|--------------|--------------|-------------|
| 4:6                 | 12.56        | 18.73        | 68.71       |

Electronic Supplementary Material (ESI) for Chemical Communications  
This journal is © The Royal Society of Chemistry 2013

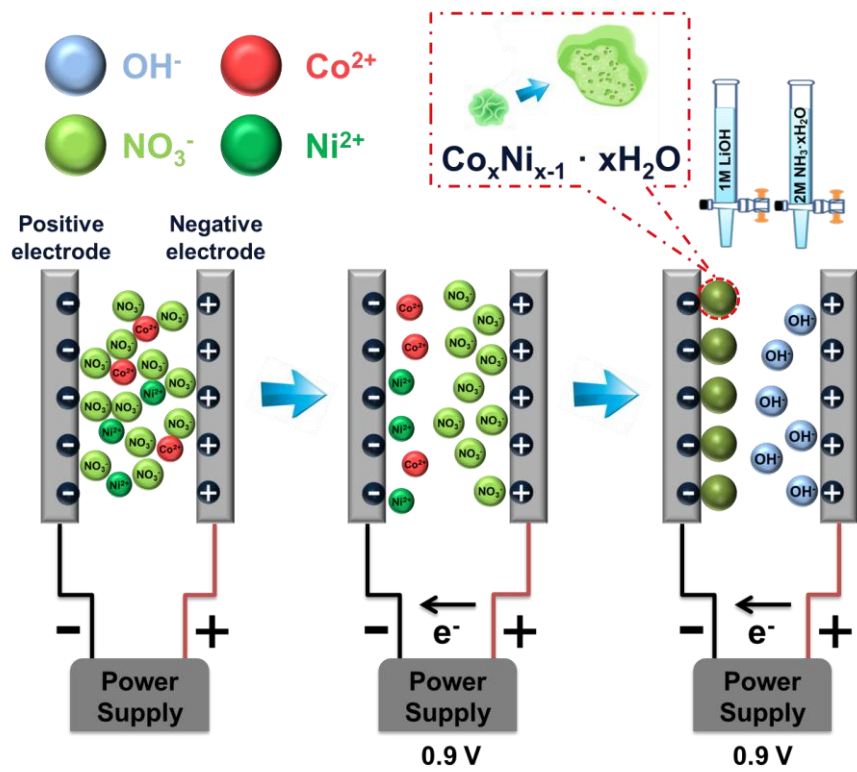

**Fig. S1.** Schematic drawing of the Co-Ni multiphase composite film and its synthetic process based on the novel co-precipitation method.

Electronic Supplementary Material (ESI) for Chemical Communications  
**This journal is © The Royal Society of Chemistry 2013**

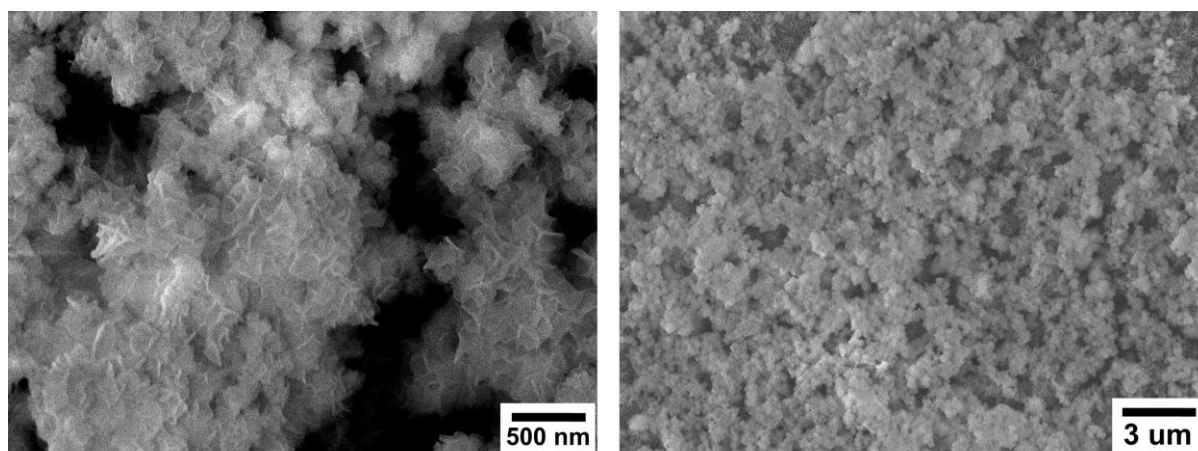

**Fig S2.** SEM images of the Co-Ni multiphase composite film showing its a corrugated morphology.

Electronic Supplementary Material (ESI) for Chemical Communications  
This journal is © The Royal Society of Chemistry 2013

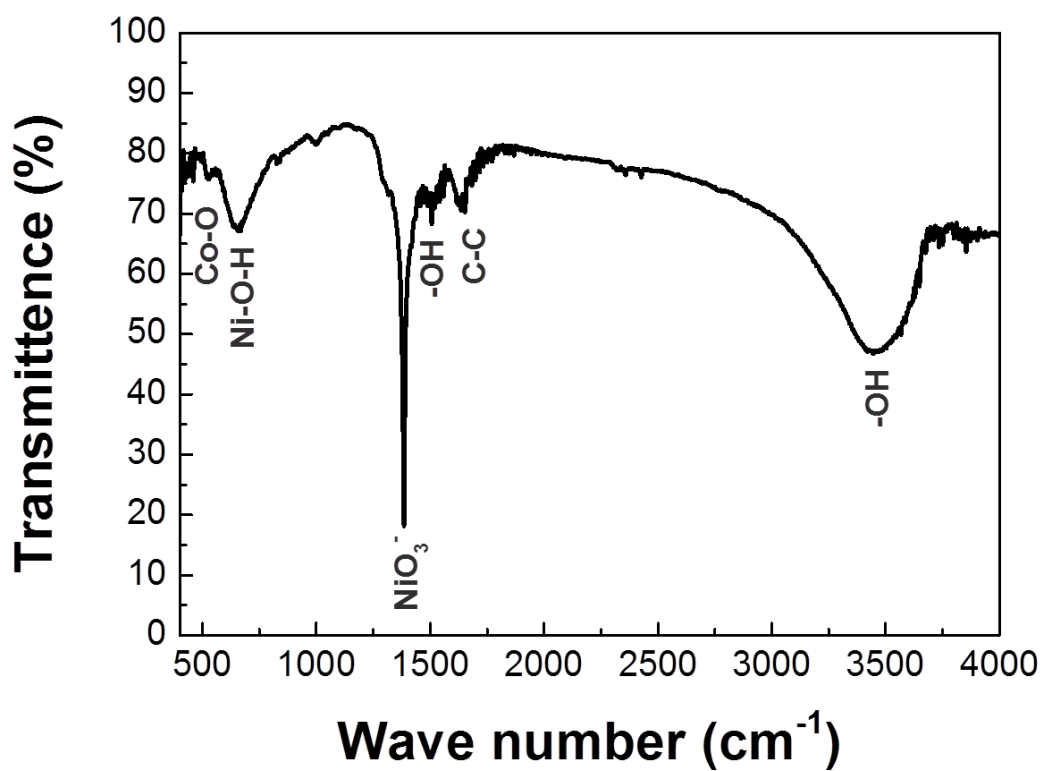

**Fig S3.** FTIR spectra of the Co-Ni multiphase composite film. Co-O, Ni-O-H, NiO<sub>3</sub><sup>-</sup> and -OH groups appear around at 520 cm<sup>-1</sup>, 660 cm<sup>-1</sup>, 1380 cm<sup>-1</sup>, 3400 cm<sup>-1</sup> and 1500 cm<sup>-1</sup>, respectively.

Electronic Supplementary Material (ESI) for Chemical Communications  
This journal is © The Royal Society of Chemistry 2013

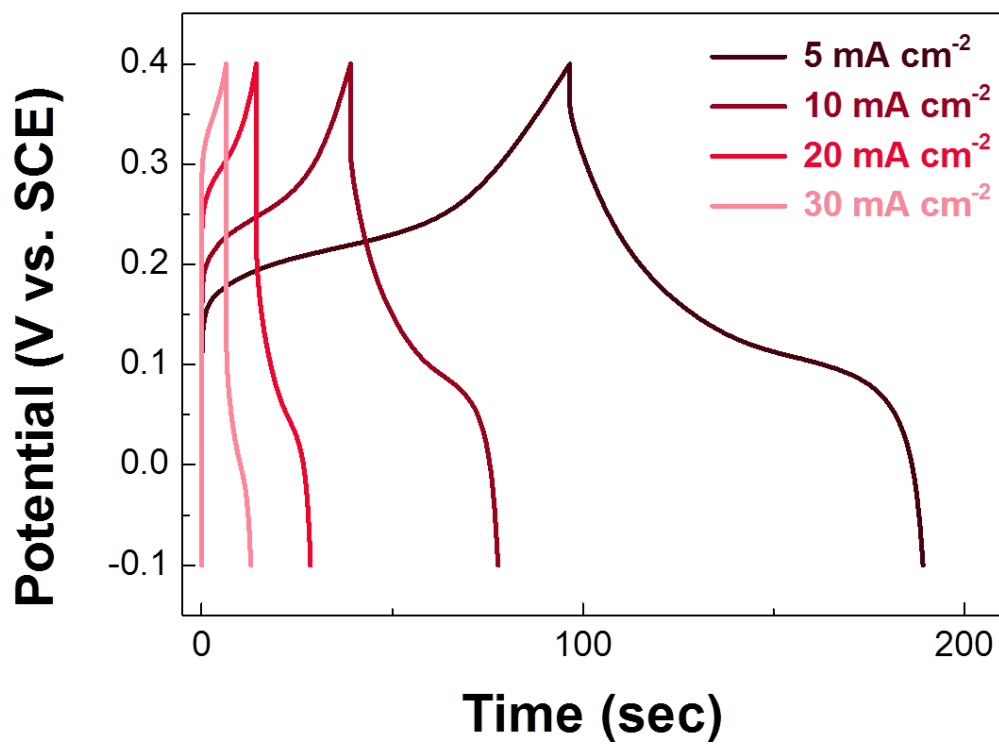

**Fig. S4.** The galvanostatic charge-discharge curves of the Co-Ni multiphase composite film at various current densities.

Electronic Supplementary Material (ESI) for Chemical Communications  
This journal is © The Royal Society of Chemistry 2013

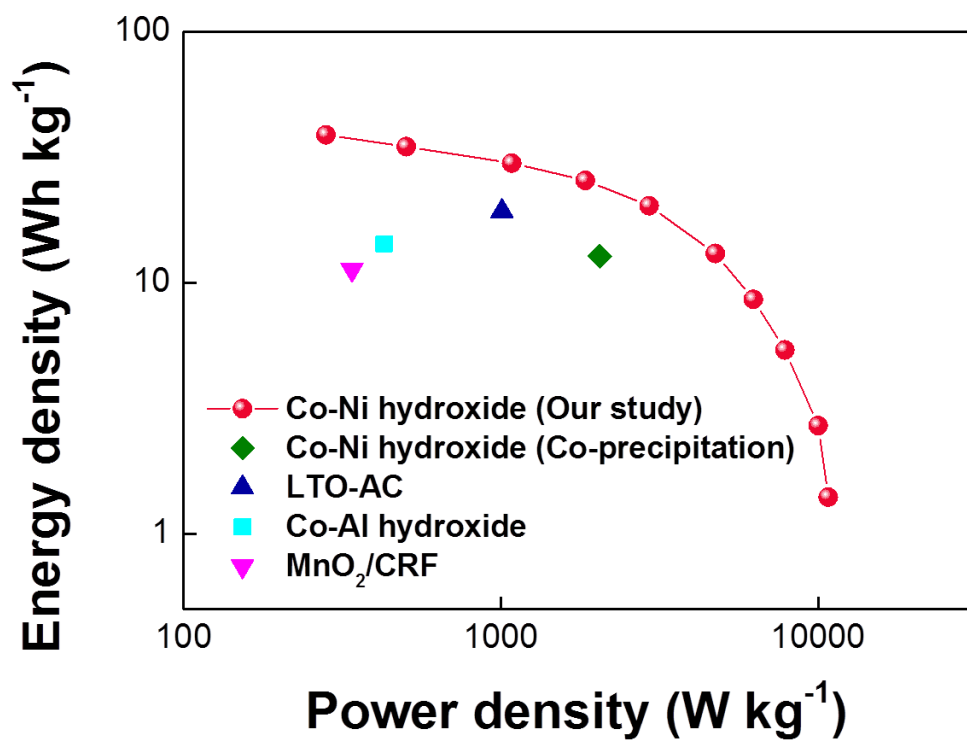

**Fig. S5.** Ragone plot representing the energy and power density in a supercapacitor of the Co-Ni multiphase composite film compared with those of other composite materials fabricated by various methods for supercapacitor
